# Supplementary material for: Evaluation of Cell Responses of Saccharomyces cerevisiae under Cultivation Using Wheat Bran as a Nutrient Resource by Analyses of Growth Activities and Comprehensive Gene Transcription Levels
Source: MDPI journal article supplement (doi:10.3390/microorganisms11112674), 2023-10-31
Supplement: s1 [file s1]

**Supplemental Table S1. quantitative PCR primers**

| Gene         |   | Primer sequences (5'→3')        |
|--------------|---|---------------------------------|
| <i>TDH2</i>  | F | cggtagatacgtggtgaagtttc         |
|              | R | tggagatggagcagtgataacaac        |
| <i>TDH3</i>  | F | tttccacgatgacaagcac             |
|              | R | gaagcccatggcaagttagc            |
| <i>RDN18</i> | F | aactcaccagggtccagacacaataagg    |
|              | R | aaggctctgttcgtatcgcaattaagc     |
| <i>KRE11</i> | F | aactgggtctgttacccaactcaac       |
|              | R | aacgcttcaatgtgacttctgtttccc     |
| <i>SGA1</i>  | F | tccaaacggatatttctgggtggtactgag  |
|              | R | gcatgatctattgtgttacattagcgggtag |
| <i>PGM1</i>  | F | tgatcctgccaaagcatatcg           |
|              | R | tgcgctgtttcgtaagaa              |
| <i>PGM2</i>  | F | gcctggtagctctggtttgc            |
|              | R | ccatcaccaccgacaacaag            |
| <i>PRM15</i> | F | aagaagtcaccgctctctgc            |
|              | R | accagcagtgccaaactgaa            |
| <i>PGL1</i>  | F | acttcaccaaacccattg              |
|              | R | tcgaatggagcaaccaaatg            |
| <i>HXX</i>   | F | aggggaaggtagtgcattgg            |
|              | R | tccggtgaaggagattgg              |
| <i>HXX1</i>  | F | attccaatgattcccggttg            |
|              | R | ccgctcaacttgaccaacac            |
| <i>HXX2</i>  | F | aaattttgcgttggccttg             |
|              | R | tgtccatgacgaaaggcttg            |
| <i>GLK1</i>  | F | gccggtcatcgatgtattt             |
|              | R | gaccccatctgacattgat             |
| <i>GAL10</i> | F | tgaatggcagaccgagttg             |
|              | R | gcctcgaaccccttaactg             |
| <i>PFK1</i>  | F | actcccggtccttgttgtt             |
|              | R | atcgccaccggtagcaatac            |
| <i>FBP1</i>  | F | cgcctcaaaaggcctctac             |
|              | R | tgtctgcttgggtgtttg              |
| <i>FBA1</i>  | F | ggctttgcaccaatctctc             |
|              | R | aaagcgatgtaccacgcgta            |
| <i>TPH1</i>  | F | ggtaccggtttgctgctac             |
|              | R | gctaccgttagcgggaacac            |
| <i>TDH1</i>  | F | atggtcacatccacaaggac            |
|              | R | ggcaagaccttaccgacagc            |
| <i>PGK1</i>  | F | attggtggtggtgacactgc            |
|              | R | agcaaacctggcaattcct             |
| <i>TDA10</i> | F | gcgaacccagaatcaaat              |
|              | R | gcactgttcgctgctc                |
| <i>ALD2</i>  | F | tcattcccccaacctctc              |
|              | R | gcgagcccgtagcaagtatc            |
| <i>ALD3</i>  | F | tcattcccccaacctctc              |
|              | R | gcgagcccgtagcaagtatc            |
| <i>ALD4</i>  | F | aaccaacgggttgtctac              |
|              | R | gcctctccacatcgtctc              |
| <i>ALD5</i>  | F | aaggctgctgccgatactgt            |
|              | R | cgcagcaaaacttaccagag            |
| <i>ALD6</i>  | F | tgaatgggtaccgaagacc             |
|              | R | gtaacatccccacgggctaa            |
| <i>HFD1</i>  | F | gcgcacaaaaggaaaagctc            |
|              | R | ggcgtaacccccacttgtta            |
| <i>GCY1</i>  | F | tggcagtcgaaagagacga             |
|              | R | ttgatggcttgaccgacttg            |
| <i>DAK1</i>  | F | aggcggtaaaagctgcagag            |
|              | R | tgaatcgccgacataggaag            |
| <i>DAK2</i>  | F | ctgatcgatgctctgcaacc            |
|              | R | ttcggcaccatcataagcag            |
| <i>GUT1</i>  | F | atggcgactgacgactcta             |
|              | R | tagccattggaccaagcagc            |
| <i>GPP1</i>  | F | catcgaagttccagggtctg            |
|              | R | tgtcacgggtaccagaggtg            |
| <i>GPP2</i>  | F | cattgaagtccaggtgcag             |
|              | R | atcacgggtaccggaagtgtg           |
| <i>GPT2</i>  | F | accacccggaatcatcaag             |
|              | R | tccgggatttcttgatttg             |
| <i>SCT1</i>  | F | tatggctcttggtgcatgg             |
|              | R | atggggtcaccgaattcaac            |

| Gene         |   | Primer sequences (5'→3') |
|--------------|---|--------------------------|
| <i>PHM8</i>  | F | ttgcaaatgggttgcgag       |
|              | R | atggataaatggcccatcc      |
| <i>GPM2</i>  | F | gcaagcacaccatccaatgt     |
|              | R | gcgtcaatccaaccaagaa      |
| <i>ENO1</i>  | F | tgacgaaggtggtgtgtc       |
|              | R | cttaccgtcgtgaccagcag     |
| <i>CDC19</i> | F | cgatttgcgcctttgtctg      |
|              | R | aaaacatcggttggcgggtct    |
| <i>PCK1</i>  | F | cagaatcaaatgcccgggtg     |
|              | R | ctgaccagcgttccagacag     |
| <i>PDA1</i>  | F | cttcattcaaacgccaaacca    |
|              | R | tgctctcaggggccttcta      |
| <i>PDB1</i>  | F | ccgctttgaagggttgaag      |
|              | R | tttgcagcgaattgacaac      |
| <i>THI3</i>  | F | gcaagctctttggggtatcg     |
|              | R | ttgcggggaatttatccttg     |
| <i>PDC1</i>  | F | catgatcagatggggttga      |
|              | R | gagcctttggaccgtgaatc     |
| <i>PDC5</i>  | F | gatcagaaacgccacttcc      |
|              | R | ctgggacagcaaacaggttgg    |
| <i>PDC6</i>  | F | gcctcacgagatgacaacg      |
|              | R | tgggatcttggatttctg       |
| <i>LPD1</i>  | F | gccacgggctctgaagtac      |
|              | R | aaccatttccaatccgatg      |
| <i>LAT1</i>  | F | ggctaaaggggccaagatg      |
|              | R | gtggcaacagcgactgagac     |
| <i>ACS1</i>  | F | ttttatgttgcaccaatgc      |
|              | R | acccaagcaacgaaagatt      |
| <i>ACS2</i>  | F | ccttgggtaccgcctcaata     |
|              | R | tgggtagccttggacgttg      |
| <i>ADH1</i>  | F | cgttaagggtctgaagatcg     |
|              | R | ccagacaagtcagcgtgagg     |
| <i>ADH2</i>  | F | cgttaagggtctgaagatcg     |
|              | R | ccagacaagtcagcgtgagg     |
| <i>ADH3</i>  | F | aagccgcaaaattcaacag      |
|              | R | accagagatggcaaccaggt     |
| <i>ADH4</i>  | F | gctgtgtctgcaacgacc       |
|              | R | gaagcgtgggaacataaag      |
| <i>ADH5</i>  | F | tcgatgggtgtaatccaag      |
|              | R | actccatgagaaccgccatt     |
| <i>ADH6</i>  | F | tccatcacatttggctgtc      |
|              | R | ttttaccctggaccgcaacc     |
| <i>ADH7</i>  | F | ggcgatcatgacgttgatgt     |
|              | R | tgggactggaccccaattac     |
| <i>SFA1</i>  | F | aatgactgatgggggtctgg     |
|              | R | ggcagccacccaatgataa      |
| <i>CIT1</i>  | F | acccttggcacaatgttgat     |
|              | R | ggagcaccacaagccctatc     |
| <i>CIT2</i>  | F | attcggatcacgaagggtgt     |
|              | R | caaacctgatgcaagggaca     |
| <i>CIT3</i>  | F | tgcgttgatgacccgtatc      |
|              | R | cttgtgctgctaaccatgc      |
| <i>ACO1</i>  | F | tgcatacaagagaccattg      |
|              | R | tccagcgtttccacattctg     |
| <i>IDP1</i>  | F | atgtgccaccatcactctg      |
|              | R | cggcggaatgtttctgatg      |
| <i>IDP2</i>  | F | tcggcacaatttgaaagc       |
|              | R | tagattccaccgcgtcaatg     |
| <i>IDP3</i>  | F | ataggccgtcatgcttttgg     |
|              | R | gcgatccaccacttttagg      |
| <i>IDH1</i>  | F | atccgtccctgggtagtgg      |
|              | R | ggcgaaatgcaaggcacaatc    |
| <i>IDH2</i>  | F | aaagggtgtcaccacccatc     |
|              | R | taagaaccggcgctcaaac      |
| <i>KGD1</i>  | F | accattcccatttgcacg       |
|              | R | tctgtgatgcccacgaacc      |
| <i>KGD2</i>  | F | tattccagccgtcaatggtg     |
|              | R | ttacgaacgacggggtaac      |
| <i>LSC1</i>  | F | atgggtgggtgatgcttttcc    |
|              | R | ttcgatttcggccttaccac     |

| Gene        |   | Primer sequences (5'→3') |
|-------------|---|--------------------------|
| <i>LSC2</i> | F | ggatttcacagcttcaactcc    |
|             | R | cctctacctccggtcaatgc     |
| <i>SDH1</i> | F | attccacacgaagtggaatgg    |
|             | R | ttggcaccatggacagaaac     |
| <i>SDH2</i> | F | ggaaggcctttgtttggtg      |
|             | R | tagcacttggtcgtcttgg      |
| <i>SDH3</i> | F | ctccgcttttcaagagcag      |
|             | R | ccgcttgggtgtcatttca      |
| <i>SDH4</i> | F | cagggtgtgttaggggcact     |
|             | R | acgacggacaaaggcaaat      |
| <i>SDH9</i> | F | gggtctggctgcctaatcac     |
|             | R | ttccatgggtgattgctctgg    |
| <i>SHH3</i> | F | ccccgagcatctgtattcgt     |
|             | R | cggccattgtggaattctt      |
| <i>SHH4</i> | F | aaagcagagctcagggttcg     |
|             | R | accaggggaactgcgatcag     |
| <i>FUM1</i> | F | aagaatgccattgcctttgg     |
|             | R | ggcctgttgaatagccttgg     |
| <i>MDH1</i> | F | tccgtgtcgaagggtttac      |
|             | R | atggcgaacaaagtcatcacg    |
| <i>MDH2</i> | F | acatggaacgcaccaaagt      |
|             | R | tcgatgcaacgaattccaag     |
| <i>MDH3</i> | F | tggaaaagtcgaccaaagt      |
|             | R | ctgcacgtaccaggtcaagg     |
| <i>HIS1</i> | F | agtggttccgtggaaggcatc    |
|             | R | gtggcttaggacgttggctc     |
| <i>HIS2</i> | F | cgggcaactgcaacgaagaa     |
|             | R | gcgccgccataggagcttat     |
| <i>HIS3</i> | F | caccactgaagactgcggga     |
|             | R | gcgtacggcctgttcgaaag     |
| <i>HIS4</i> | F | ggtgccaactgcgaacctt      |
|             | R | cctcctcttggcaacgcac      |
| <i>HIS5</i> | F | tgttggtctctacagctccac    |
|             | R | ctggccaactctgctgttgc     |
| <i>HIS6</i> | F | gacggctgttgattgtggc      |
|             | R | ccttcacgtctgcagcgtg      |
| <i>HIS7</i> | F | agctctaagtgcttgggga      |
|             | R | gccactggaatgcaatgacgg    |
| <i>PRS1</i> | F | ggtgacgatgaggcagacga     |
|             | R | tcgtcttcggagtcgacagc     |
| <i>PRS2</i> | F | ggtgcaaaaagggtgcttc      |
|             | R | cgaacagcagcattcgcgaa     |
| <i>PRS3</i> | F | gcttcgaagactgcgtctgc     |
|             | R | tgatcacaccggctgttgt      |
| <i>PRS4</i> | F | tggatctcatgctcccaa       |
|             | R | ctgcatcaggcgacaccaa      |
| <i>PRS5</i> | F | tcacagtggttgggtccag      |
|             | R | taaccctcgaggcagagcg      |
| <i>RK11</i> | F | tcgatgcggatttcgggaa      |
|             | R | tgtttccaccacgccacta      |
| <i>RPE1</i> | F | agggcataaaagctgcatgc     |
|             | R | ttggcctccaaacccagggt     |
| <i>TKL1</i> | F | aactcaggteaccaggtgc      |
|             | R | ccagctgggttgggtgggt      |
| <i>TKL2</i> | F | atagcgcaaggccaactttgc    |
|             | R | cccaattgcagatgtcccgc     |
| <i>NQM1</i> | F | ttggtggaattcggcacc       |
|             | R | agagccttcttaccgfcgc      |
| <i>TAL1</i> | F | tgccgaaggcccaagttactt    |
|             | R | aacacctgggtcgggttcac     |
| <i>ARO1</i> | F | ggtgcccatgctgctttgt      |
|             | R | tcagggaacaactgccaatt     |
| <i>ARO2</i> | F | ggcgacttcacgtactcga      |
|             | R | ctgaagcgacacggccaatc     |
| <i>ARO3</i> | F | ccatcggcgccagaactact     |
|             | R | gttcattgtcagcggctctc     |
| <i>ARO4</i> | F | ctcaattgctgcccgggtcc     |
|             | R | tggcgttttcaccgttagcg     |
| <i>ARO7</i> | F | tcaccaattctccgttgaaga    |
|             | R | cgttgtaggggtccacacca     |

| Gene         |   | Primer sequences (5'→3') |
|--------------|---|--------------------------|
| <i>ARO8</i>  | F | accttcccggtgccaattga     |
|              | R | ggagcaccagggtgtccagtt    |
| <i>TRP1</i>  | F | gcagggtgggacaggfgaact    |
|              | R | gcagggtgggacaggfgaact    |
| <i>TRP2</i>  | F | gaaaggagaagcgtgggggt     |
|              | R | caataccaccgccagcttgc     |
| <i>TRP3</i>  | F | gctgaagtcaagcgtgcctc     |
|              | R | atgcaccagcctctgcgtat     |
| <i>TRP4</i>  | F | atgtccgagggcacttttct     |
|              | R | ccagcaacgcctcgtgtagg     |
| <i>TRP5</i>  | F | taccaggtgtcgggtcaga      |
|              | R | agcctgagcgtcagtagctg     |
| <i>PHA2</i>  | F | cggccgattgcgacaactt      |
|              | R | gcctgcgtctcctctctct      |
| <i>TYR1</i>  | F | tggatccaggcaaaagcact     |
|              | R | tccggcagcttacaaactgt     |
| <i>SER1</i>  | F | caacatttcggagcagggcc     |
|              | R | tggcatccttcgaacggfga     |
| <i>SER2</i>  | F | tggfeggtgacggfgtgaac     |
|              | R | ttctgcacctttggcttggc     |
| <i>SER3</i>  | F | gcctfgggtactgccagaca     |
|              | R | gcgccatcctcatagagc       |
| <i>SER33</i> | F | tcgctgctatgaaggacggg     |
|              | R | gcacctgcaattttgtggcc     |
| <i>CHA1</i>  | F | tgattgaaccggcatgtggc     |
|              | R | aggagccgccacaagcaata     |
| <i>ILV1</i>  | F | tgaagagcgtggcttgacga     |
|              | R | cgggaacaaagacagaccg      |
| <i>MYC1</i>  | F | cattgctggctgcggfctg      |
|              | R | tccgctagaacgacatggca     |
| <i>MET2</i>  | F | agggaaggagacacgcaaac     |
|              | R | tggacaccacgctttgacct     |
| <i>MET6</i>  | F | acgttgcgtgctgccctagaa    |
|              | R | ccttaacggcagcatcgtgg     |
| <i>MET17</i> | F | aagggtggtgctgcttctg      |
|              | R | caccagtggtgtgccaaacct    |
| <i>CYS3</i>  | F | aatcgcttcctcagggtcc      |
|              | R | gcgttggcgactttggtgaa     |
| <i>CYS4</i>  | F | ttgctggtgctggfctgtgt     |
|              | R | cgaatgggtcagcaccaacg     |
| <i>IRC7</i>  | F | ggcaatgttaccagggtgccg    |
|              | R | gatttccgagccaagcagcc     |
| <i>STR2</i>  | F | atcttcagcggcgactcgaa     |
|              | R | cgcactctcgcaccataggc     |
| <i>STR3</i>  | F | ggattacgctcacaaccggga    |
|              | R | tcgaaggacccegtttcgaa     |
| <i>SAM1</i>  | F | tgtgaaaccgcggcaaaagac    |
|              | R | agtcgaaacccttggcggaa     |
| <i>SAM2</i>  | F | tggctctcaagggtgacgtg     |
|              | R | ttaccggagaaggcaccacc     |
| <i>SHM1</i>  | F | tgatcgtggccggfcttcc      |
|              | R | ggacaacattggctgccacc     |
| <i>SHM2</i>  | F | atcgccgacaaatgtgtgct     |
|              | R | agattggatgacacctggg      |
| <i>GLY1</i>  | F | acgacttgcggctcagacaca    |
|              | R | acagcgtcaccgatagaggg     |
| <i>THR1</i>  | F | gtcaggtgcaggcccaacta     |
|              | R | tagcaccatcgtaggcaggg     |
| <i>THR4</i>  | F | aacacaacgtcggfctgtt      |
|              | R | accgttgggtggcttgggaaga   |
| <i>ILV2</i>  | F | ttacaacgggtgtggggcga     |
|              | R | caacttgagcaccgatggcg     |
| <i>ILV3</i>  | F | accgggtgacactttggcaga    |
|              | R | tttgcaagtgaccgttggcc     |
| <i>ILV5</i>  | F | gctgccatcgaagacggfctg    |
|              | R | gagcggcatcggacaacaag     |

| Gene         |   | Primer sequences (5'→3') |
|--------------|---|--------------------------|
| <i>ILV6</i>  | F | caagacctcccttgcccaca     |
|              | R | acaccgggttcgtttgac       |
| <i>ALT1</i>  | F | ggcagttcaagaagtcgcc      |
|              | R | accgggaacagtgcaaatgc     |
| <i>ALT2</i>  | F | aaagcgaagccttggatc       |
|              | R | aagtcctgggtcttggcgg      |
| <i>BAT1</i>  | F | ctcgtactgggtgcccatt      |
|              | R | tcgggaatgctggccgaa       |
| <i>BAT2</i>  | F | gctgccctgtgggtcttat      |
|              | R | ttgtcaccacagctctctgg     |
| <i>LEU1</i>  | F | atgtccacacatcggtcc       |
|              | R | tacaaaagccagcgaacca      |
| <i>LEU2</i>  | F | tgggtttgttgccatctgg      |
|              | R | accgtggcatgggtctaca      |
| <i>LEU4</i>  | F | tgggtgtgagtgctccga       |
|              | R | ccctcgacctggcacaaga      |
| <i>LEU9</i>  | F | gcaaccgaagcggcatctt      |
|              | R | ggagacacacacccacaca      |
| <i>PYC1</i>  | F | agaatgtgggtgggtgcca      |
|              | R | caccattggcaccacgaat      |
| <i>PYC2</i>  | F | ttcccgggtaccagacct       |
|              | R | gccacgtcgtacattctct      |
| <i>AAT1</i>  | F | gtccgcagttgggcattt       |
|              | R | tacagctaggcggcctgac      |
| <i>AAT2</i>  | F | gcactcttgcccataacc       |
|              | R | tccagtggaacacctgg        |
| <i>HOM2</i>  | F | actgcaggttgggtgcacc      |
|              | R | tgggagaacacagacctg       |
| <i>HOM3</i>  | F | gggtcgtcaaaagtctgg       |
|              | R | aagaacgggcggaacaacg      |
| <i>HOM6</i>  | F | cgttatgggtgccgggttg      |
|              | R | agaacgtcagcttcagcca      |
| <i>ASN1</i>  | F | acgattctcttcaacccaa      |
|              | R | ccgtatggacttcggccat      |
| <i>ASN2</i>  | F | gggcattcttgacccatg       |
|              | R | acagtgctgccagctctt       |
| <i>LYS1</i>  | F | cggtgccctgatctgttgc      |
|              | R | aaaggacaccacgggaag       |
| <i>LYS2</i>  | F | gcggctcactgttgat         |
|              | R | aaccattggcagagccact      |
| <i>LYS4</i>  | F | acggcctgtgatctggag       |
|              | R | accacaacctccaagctcc      |
| <i>LYS9</i>  | F | ccaattgctggaagaaaga      |
|              | R | gcctaaccaagaacccgg       |
| <i>LYS12</i> | F | ccatgccatgtctgcacc       |
|              | R | cagcttctgttgcccaag       |
| <i>LYS20</i> | F | gcttggaaaggtgggccag      |
|              | R | ttcttgcctagcccaact       |
| <i>LYS21</i> | F | gcttggaaaggtgggccag      |
|              | R | ttcttgcctagcccaact       |
| <i>ACO2</i>  | F | aaagccggcttgaacacag      |
|              | R | gggcgcgcatgttctaa        |
| <i>GLT1</i>  | F | atgtccagaccctgtgagg      |
|              | R | agccagtgctgtactgg        |
| <i>GLN1</i>  | F | accgcttccatgaactgctt     |
|              | R | cttcttggcgacgtatct       |
| <i>PRO1</i>  | F | caaacccagatgccatgccg     |
|              | R | cggctccaaagtcagaaact     |
| <i>PRO2</i>  | F | aggggtgctgactctctgg      |
|              | R | actcaccagaccgtccaagc     |
| <i>PRO3</i>  | F | gtgcgggtgggtctctaca      |
|              | R | agccgttagagcatccatgt     |
| <i>ARG1</i>  | F | acgctctgaagccagaggt      |
|              | R | tgggttggcgacgggaata      |
| <i>ARG2</i>  | F | gcaccaagcatcttgcaca      |
|              | R | gttggcgacggcggaattac     |
| <i>ARG3</i>  | F | tgcctgagaaacggfagga      |
|              | R | cagcttggcctgtttcga       |
| <i>ARG4</i>  | F | gggggggagattactctgg      |
|              | R | ctcgcaagcccgctgtgat      |
| <i>ARG7</i>  | F | tttgcatgttggccaacgg      |
|              | R | tcgaacctcaccatcgga       |
| <i>ARG8</i>  | F | accaagtgagctcatccgg      |
|              | R | cattgacgatgtggcagcg      |
| <i>ARG56</i> | F | tcaagggtgggtgggccatt     |
|              | R | ggctcaattccctgcttc       |
| <i>CAR1</i>  | F | cgcgccttttccatgacc       |
|              | R | tttgttctgggtgcacggc      |
